# Supplementary material for: A SPOPL/Cullin-3 ubiquitin ligase complex regulates endocytic trafficking by targeting EPS15 at endosomes
Source: eLife. 2016 Mar 23;5:e13841. doi: 10.7554/eLife.13841 (PMC4846373; doi:10.7554/eLife.13841)
Supplement: Supplementary file 1. — A549 cells were depleted of individual BTB domain containing proteins by using up to 4 different siRNAs in a 96-well plate setting. After 72 hr of transfection cells were infected with IAV. Infected cells were visualized by immunofluorescence staining of the viral protein NP. The assay was quantified as described in the legend to Figure 1 and plotted as percentage (%) of NP positive cells compared to control (siControl). BTB domain containing proteins were counted as a hit, if IAV infection was reduced with at least 2 different siRNAs by 49% or more compared to siControl. DOI: http://dx.doi.org/10.7554/eLife.13841.014 [file elife-13841-supp1.xlsx]

## Sheet: Sheet1
	Supplementary table 1: BTB siRNA screening
		cut off 51%
		AVERAGE	How many positive
	protein name	rel inf	siRNAS?
	ABTB1	>
	ABTB2	>
	ANKFY1	>
	ASB6	>
	BACH1	<	1
	BACH2	>
	BCL6	>
	BCL6B	<	2
	BTBD1	>
	BTBD11	>
	BTBD12	>
	BTBD14A	<	1
	BTBD14B	>
	BTBD16	<	2
	BTBD2	>
	BTBD3	>
	BTBD6	>
	BTBD7	>
	BTBD8	>
	BTBD9	>
	C16orf44	>
	C2orf44	>
	CCIN	>
	CDC2	>
	CUL3	<	2
	CUL4A	<	1
	ENC1	>
	GAN	<	2
	GMCL1	>
	GZF1	>
	HIC1	>
	HIC2	<	1
	IBTK	>
	INCENP	>
	IPP	>
	IVNS1ABP	>
	KBTBD10	>
	KBTBD11	>
	KBTBD2	<	1
	KBTBD3	>
	KBTBD4	<	1
	KBTBD5	>
	KBTBD6	>
	KBTBD7	>
	KBTBD8	>
	KCTD10	>
	KEAP1	<	1
	KLHDC5	>
	KLHL1	>
	KLHL10	>
	KLHL11	>
	KLHL12	<	1
	KLHL13	<	2
	KLHL14	<	1
	KLHL15	>
	KLHL17	<
	KLHL18	<	1
	KLHL2	<	2
	KLHL20	>
	KLHL21	>
	KLHL22	<	1
	KLHL23	>
	KLHL24	>
	KLHL25	<	2
	KLHL26	<	2
	KLHL28	>
	KLHL29	<	2
	KLHL3	>
	KLHL30	<	3
	KLHL31	>
	KLHL32	<
	KLHL34	>
	KLHL4	>
	KLHL5	>
	KLHL6	>
	KLHL7	>
	KLHL8	>
	KLHL9	>
	LGALS3BP	<	1
	LOC149478	>
	LOC388419	>
	LUC7L2	>
	LZTR1	>
	MYNN	>
	MYO1E	<	1
	NOL5A	>
	PATZ1	<	1
	PRDX4	<	2
	PSMD2	>
	RCBTB1	>
	RCBTB2	>
	RECQL	>
	RHOBTB1	>
	RHOBTB2	>
	RHOBTB3	>
	SB1	>
	SPOP	<	2
	SPOPL	<	3
	TNFAIP1	<	1
	TRIM5	>
	TUBA4A	>
	TUFM	>
	UBE1C	>
	UNC45A	<	1
	USP33	<	2
	YWHAE	<	1
	ZBTB1	<	1
	ZBTB10	>
	ZBTB11	>
	ZBTB12	<	1
	ZBTB16	<	1
	ZBTB17	>
	ZBTB2	>
	ZBTB20	<
	ZBTB22	>
	ZBTB24	>
	ZBTB25	<	1
	ZBTB26	>
	ZBTB3	>
	ZBTB32	>
	ZBTB33	>
	ZBTB34	>
	ZBTB37	>
	ZBTB38	>
	ZBTB39	<	3
	ZBTB4	>
	ZBTB40	>
	ZBTB41	<	1
	ZBTB43	<	3
	ZBTB44	<	1
	ZBTB45	>
	ZBTB46	<	2
	ZBTB47	>
	ZBTB48	<	1
	ZBTB5	>
	ZBTB6	>
	ZBTB7A	>
	ZBTB7B	<	1
	ZBTB7C	<	1
	ZBTB8	>
	ZBTB9	>
	ZFP161	>
	ZNF131	>
	ZNF238	>
	ZNF295	>
	ZNF364	>				Hit (2 or more siRNAs positive)
	ZNF509	>
	ZNHIT2	>				positive Control
