# Supplementary figures and images for: A SPOPL/Cullin-3 ubiquitin ligase complex regulates endocytic trafficking by targeting EPS15 at endosomes
Source: eLife journal article supplement (doi:10.7554/elife.13841), 2016-03-23

Figure 1 - figure supplement 1

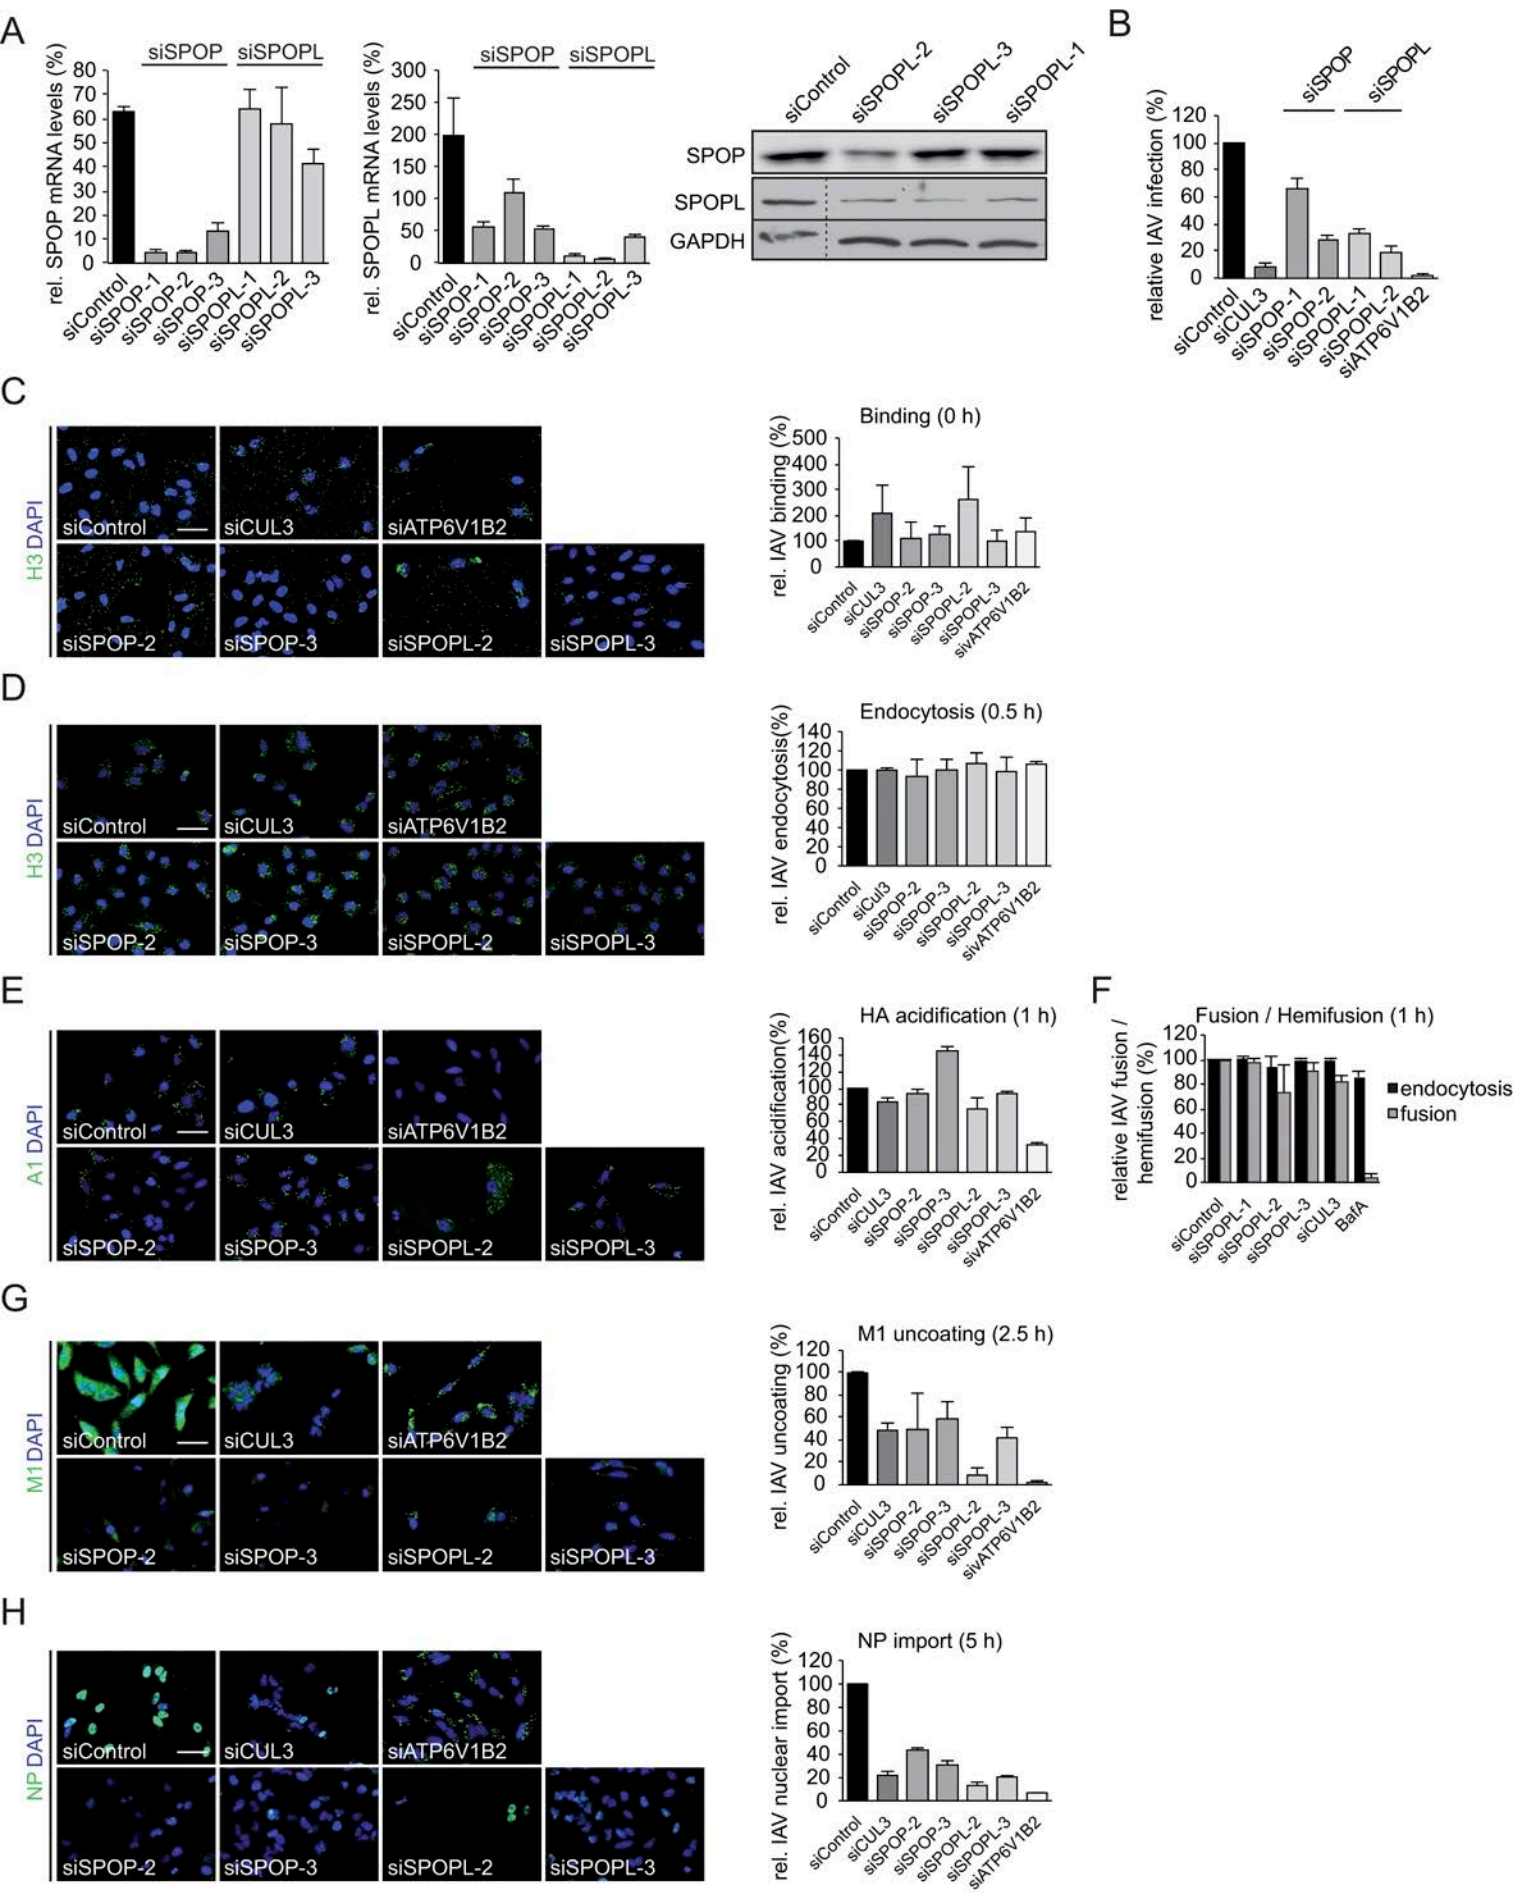

Supplement: supp [file elife_poa_e13841_Figure_1_figure_supplement_1.pdf › elife_poa_e13841_Figure_1_figure_supplement_1.pdf]

Figure 2 - figure supplement 1

A

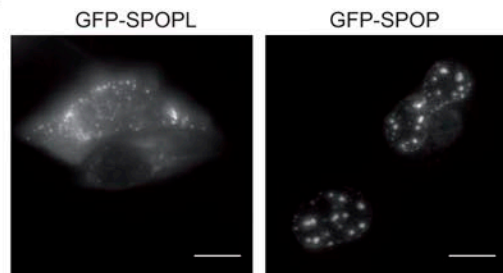

B

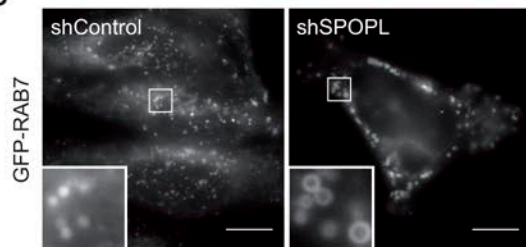

C

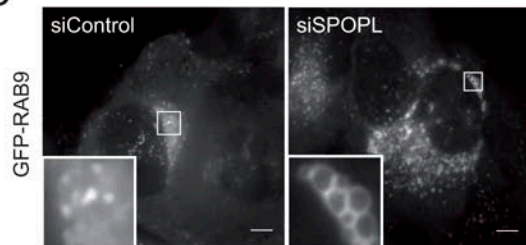

D

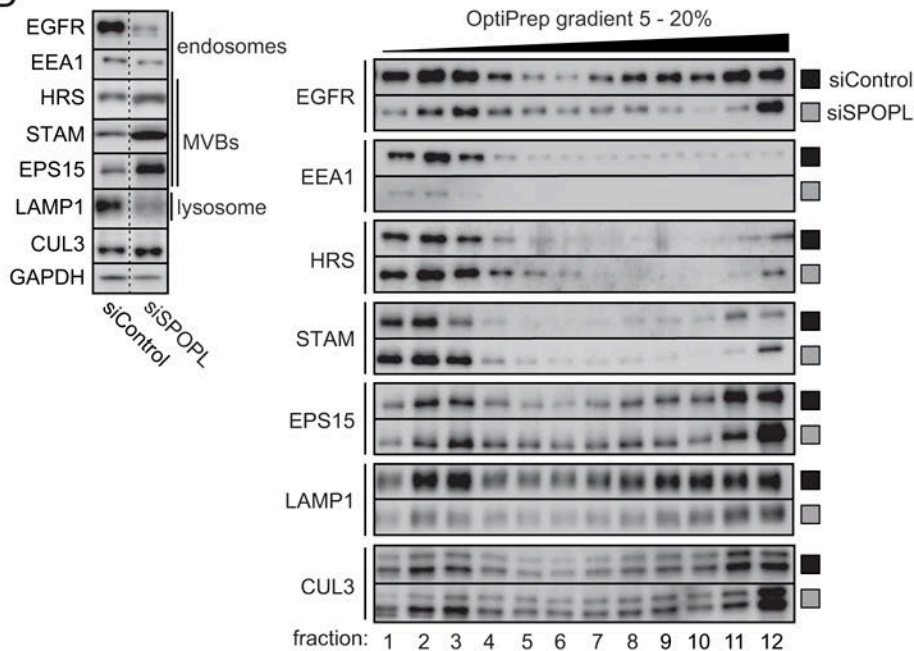

Supplement: supp [file elife_poa_e13841_Figure_2_figure_supplement_1.pdf › elife_poa_e13841_Figure_2_figure_supplement_1.pdf]

Figure 3 - figure supplement 1

A

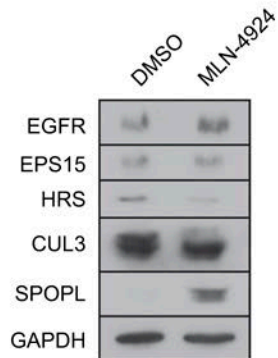

B

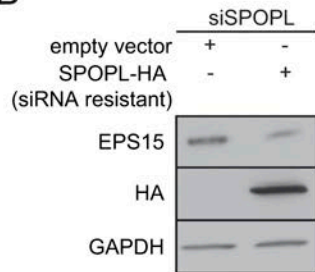

C

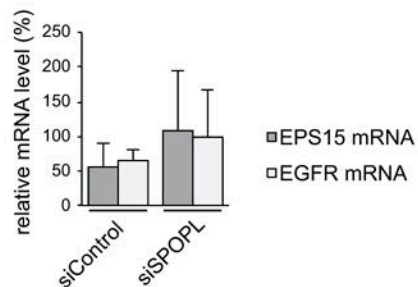

D

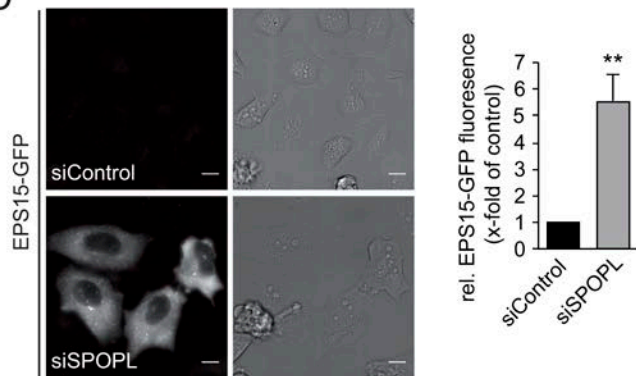

E

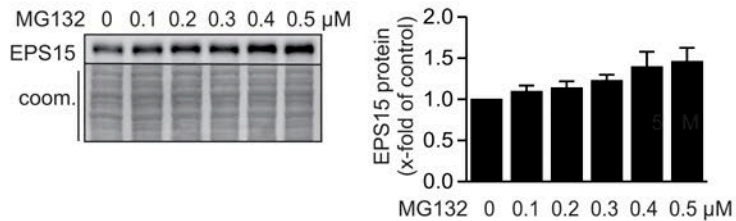

F

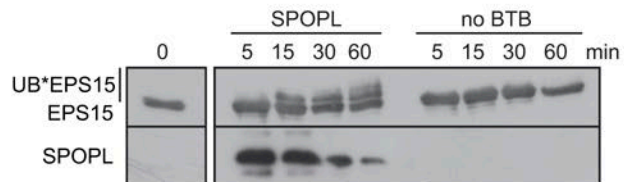

Supplement: supp [file elife_poa_e13841_Figure_3_figure_supplement_1.pdf › elife_poa_e13841_Figure_3_figure_supplement_1.pdf]

Figure 4 - figure supplement 1

A

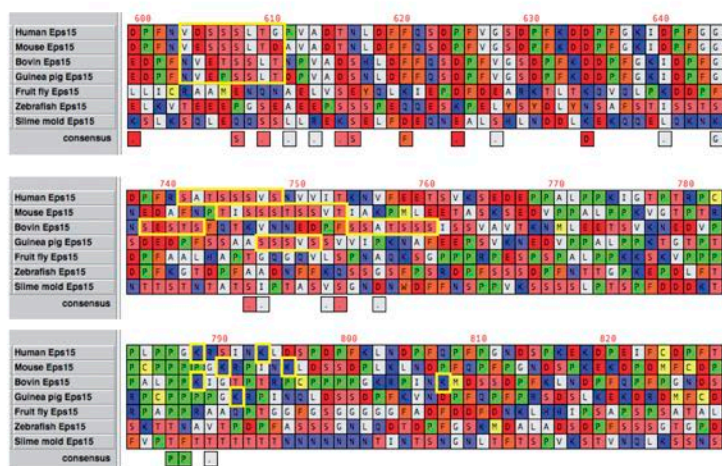

B

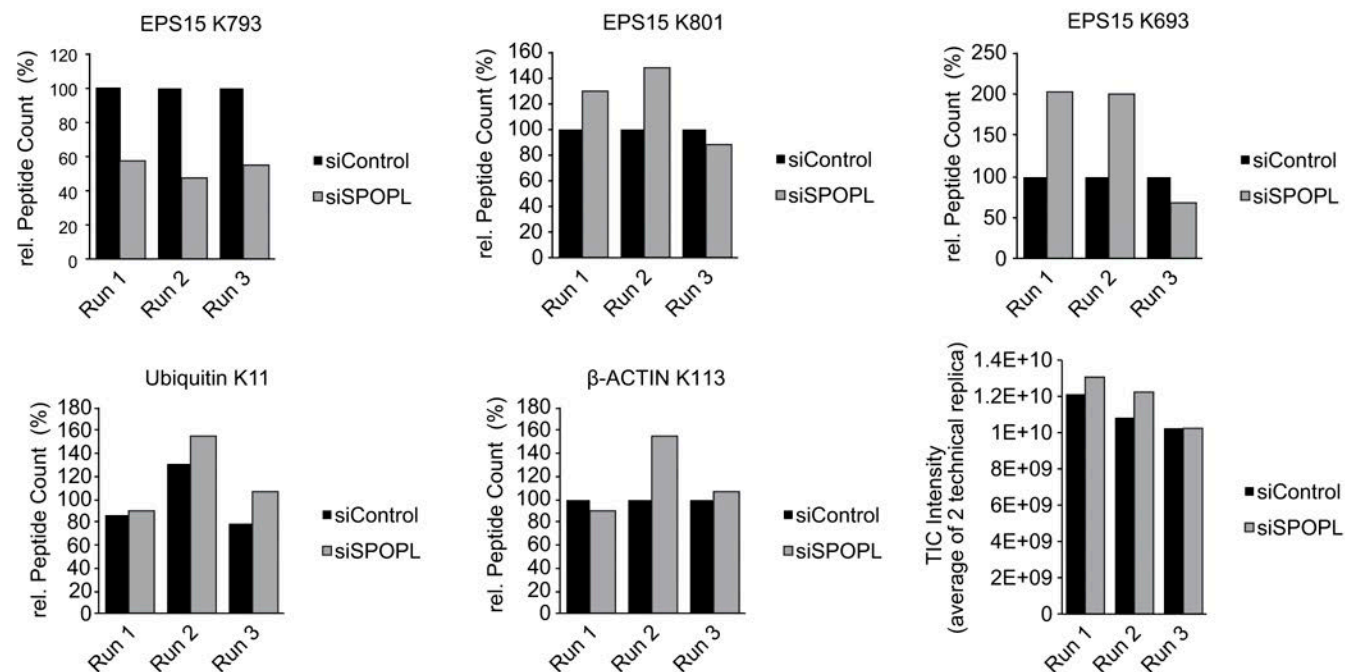

C

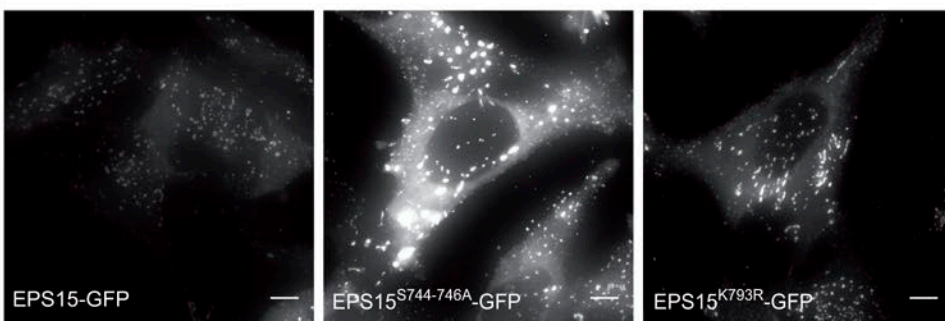

Supplement: supp [file elife_poa_e13841_Figure_4_figure_supplement_1.pdf › elife_poa_e13841_Figure_4_figure_supplement_1.pdf]

Figure 5 - figure supplement 1

A

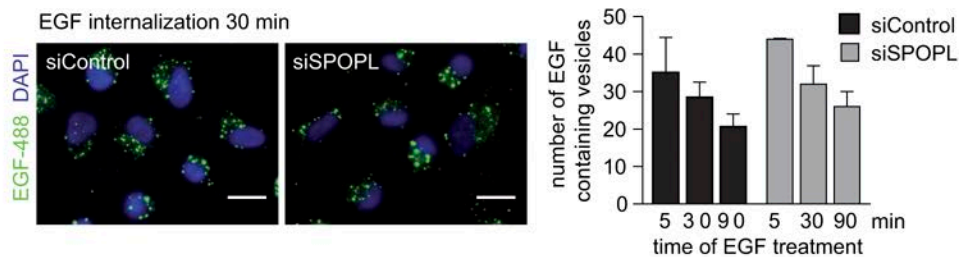

B

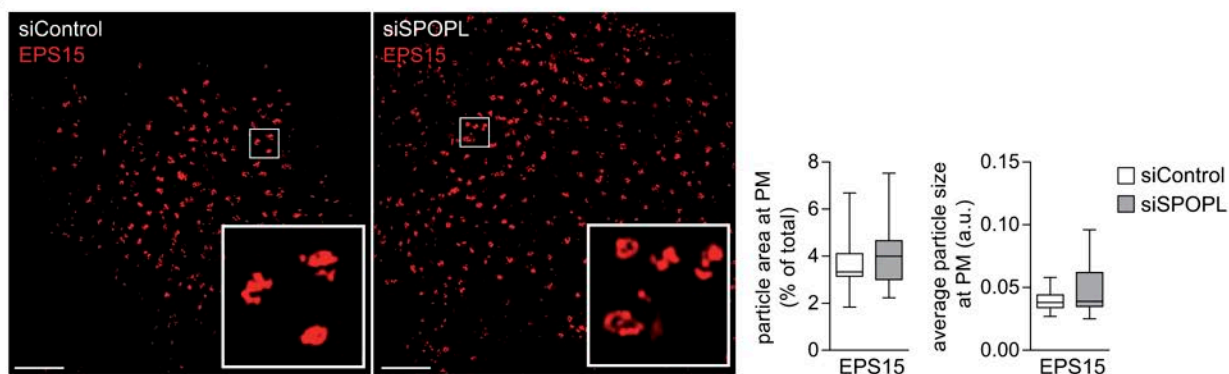

C

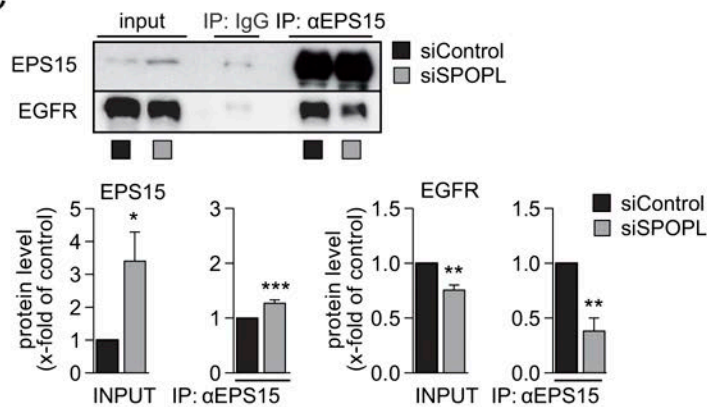

D

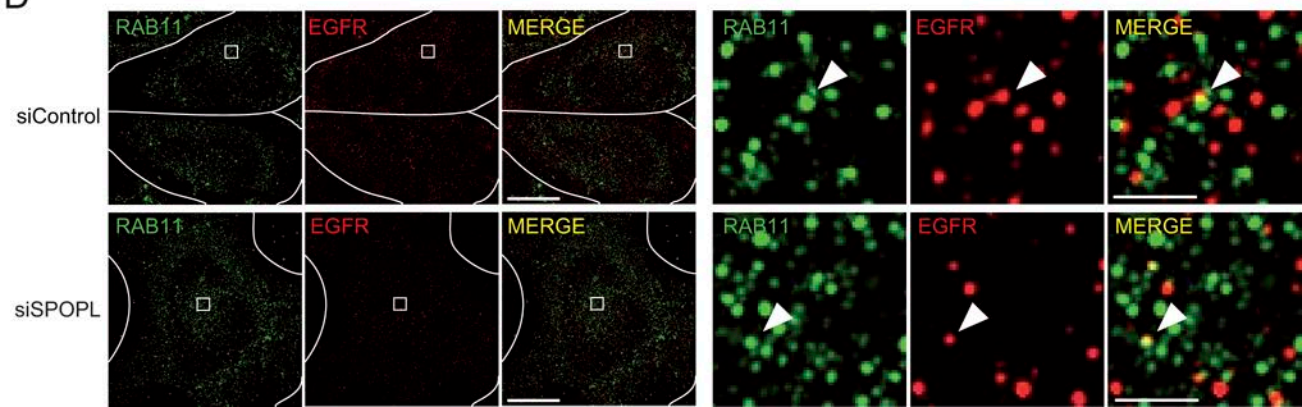

Supplement: supp [file elife_poa_e13841_Figure_5_figure_supplement_1.pdf › elife_poa_e13841_Figure_5_figure_supplement_1.pdf]
